# Supplementary material for: Body Mass Index Trends before and during the COVID-19 Pandemic in Primary School Students in Split-Dalmatia County, Croatia: A Retrospective Study
Source: MDPI journal article supplement (doi:10.3390/nu16010050), 2023-12-22
Supplement: s1 [file s1]

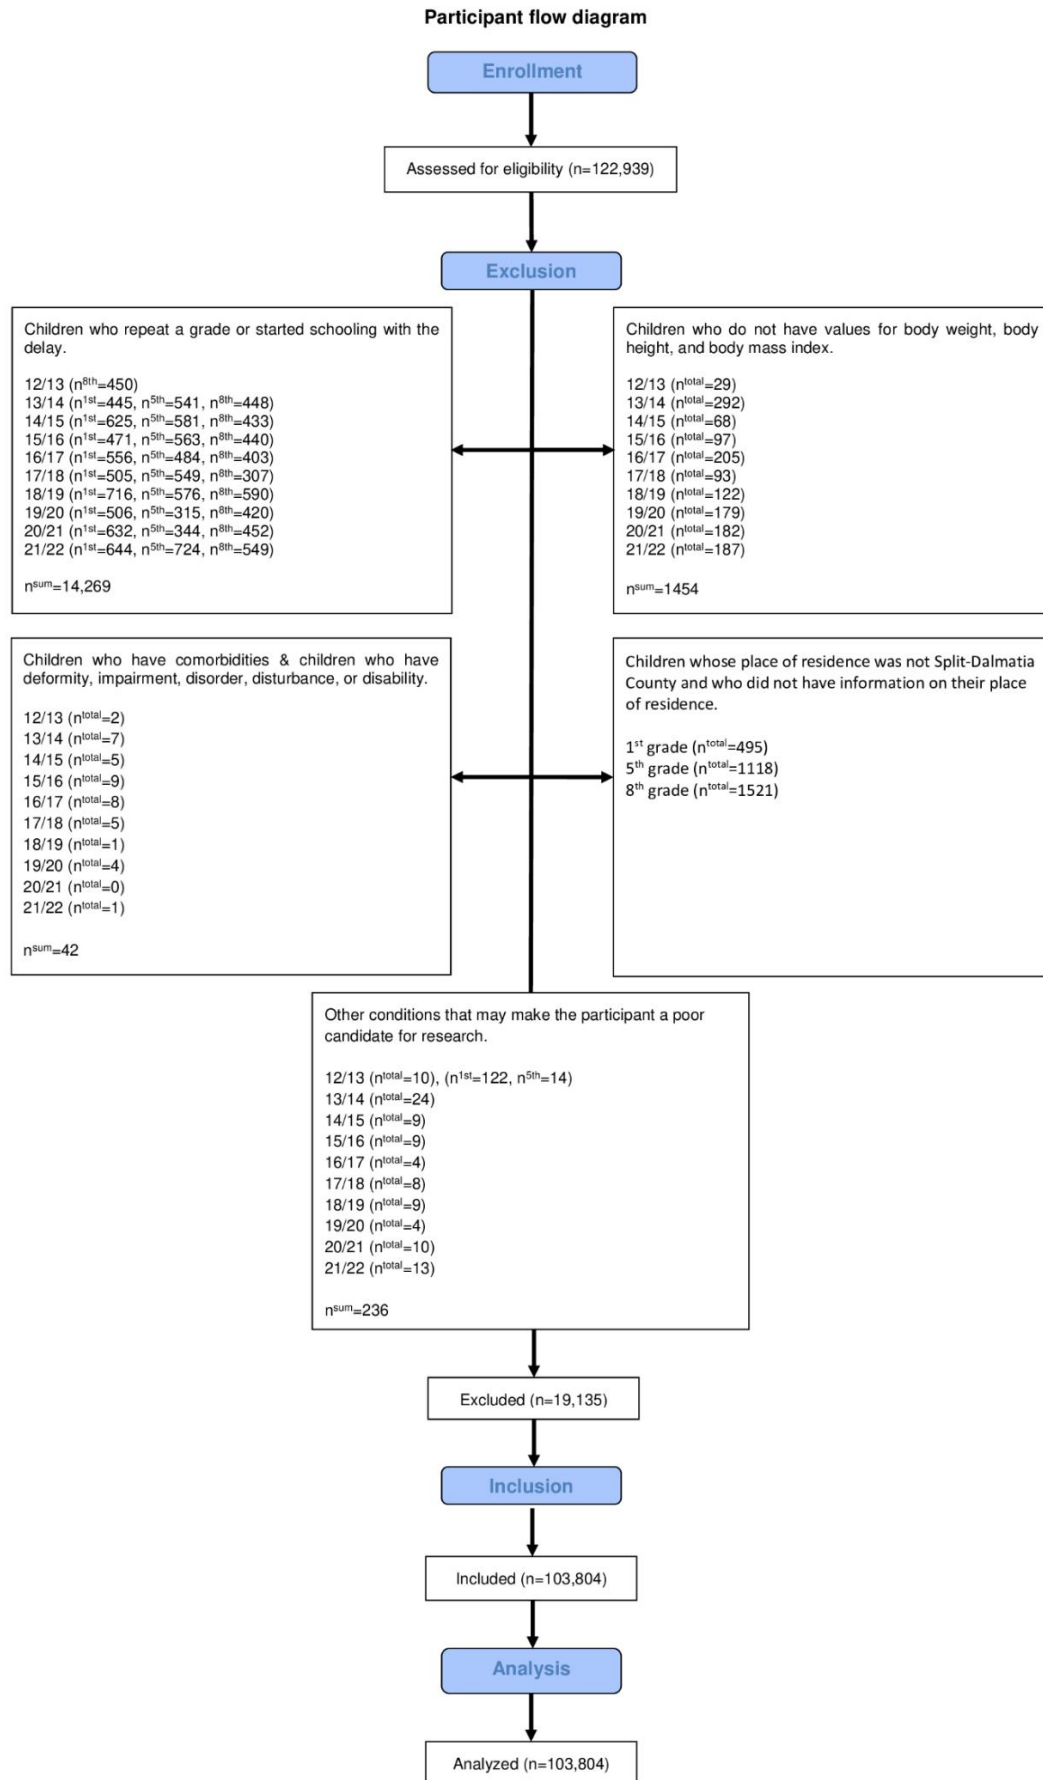

**Figure S1: Participant flow diagram**

**Supplemental Table S1.** Effect: SEX x GENERATION; unweighted Means, current effect, effective hypothesis decomposition; BMI in 1<sup>st</sup> graders

| SEX                 | Generation | Mean  | Std. Err. | -95.00%   | +95.00% | N    |
|---------------------|------------|-------|-----------|-----------|---------|------|
| <b>Boys</b>         | 2013/14    | 16.13 | 0.05      | 16.03     | 16.23   | 1925 |
|                     | 2014/15    | 16.18 | 0.05      | 16.08     | 16.27   | 2134 |
|                     | 2015/16    | 16.12 | 0.05      | 16.03     | 16.22   | 2128 |
|                     | 2016/17    | 16.11 | 0.05      | 16.02     | 16.21   | 2057 |
|                     | 2017/18    | 16.11 | 0.05      | 16.01     | 16.20   | 2027 |
|                     | 2018/19    | 15.89 | 0.05      | 15.79     | 15.99   | 1882 |
|                     | 2019/20    | 15.92 | 0.05      | 15.82     | 16.02   | 1933 |
|                     | 2020/21    | 16.03 | 0.05      | 15.92     | 16.13   | 1839 |
|                     | 2021/22    | 16.25 | 0.05      | 16.14     | 16.35   | 1809 |
| <b>Girls</b>        | 2013/14    | 16.36 | 0.05      | 16.26     | 16.46   | 2029 |
|                     | 2014/15    | 16.39 | 0.05      | 16.30     | 16.49   | 2112 |
|                     | 2015/16    | 16.27 | 0.05      | 16.18     | 16.36   | 2137 |
|                     | 2016/17    | 16.27 | 0.05      | 16.17     | 16.36   | 2262 |
|                     | 2017/18    | 16.33 | 0.05      | 16.24     | 16.43   | 2174 |
|                     | 2018/19    | 16.05 | 0.05      | 15.95     | 16.15   | 2048 |
|                     | 2019/20    | 16.06 | 0.05      | 15.96     | 16.16   | 2028 |
|                     | 2020/21    | 16.16 | 0.05      | 16.06     | 16.26   | 1888 |
|                     | 2021/22    | 16.35 | 0.05      | 16.26     | 16.45   | 1949 |
| F (8.36343) = 0.383 |            |       |           | p = 0.930 |         |      |

**Supplemental Table S2.** Effect: SEX x GENERATION; unweighted Means, current effect, effective hypothesis decomposition; BMI in 5<sup>th</sup> graders

| Sex                 | Generation | Mean  | Std. Err. | -95.00%   | +95.00% | N    |
|---------------------|------------|-------|-----------|-----------|---------|------|
| <b>Boys</b>         | 2013/14    | 18.97 | 0.08      | 18.81     | 19.13   | 1725 |
|                     | 2014/15    | 18.88 | 0.09      | 18.71     | 19.05   | 1645 |
|                     | 2015/16    | 18.87 | 0.08      | 18.71     | 19.03   | 1788 |
|                     | 2016/17    | 19.04 | 0.08      | 18.89     | 19.19   | 1942 |
|                     | 2017/18    | 18.84 | 0.08      | 18.68     | 19.00   | 1778 |
|                     | 2018/19    | 18.73 | 0.08      | 18.57     | 18.88   | 1869 |
|                     | 2019/20    | 18.80 | 0.08      | 18.64     | 18.97   | 1691 |
|                     | 2020/21    | 19.31 | 0.11      | 19.09     | 19.52   | 973  |
|                     | 2021/22    | 18.88 | 0.09      | 18.71     | 19.04   | 1613 |
| <b>Girls</b>        | 2013/14    | 19.34 | 0.08      | 19.18     | 19.50   | 1830 |
|                     | 2014/15    | 19.22 | 0.09      | 19.05     | 19.40   | 1561 |
|                     | 2015/16    | 19.35 | 0.08      | 19.19     | 19.50   | 1859 |
|                     | 2016/17    | 19.29 | 0.08      | 19.13     | 19.44   | 1866 |
|                     | 2017/18    | 19.29 | 0.08      | 19.13     | 19.44   | 1829 |
|                     | 2018/19    | 19.40 | 0.08      | 19.24     | 19.56   | 1740 |
|                     | 2019/20    | 19.33 | 0.09      | 19.16     | 19.50   | 1602 |
|                     | 2020/21    | 19.73 | 0.11      | 19.52     | 19.94   | 1057 |
|                     | 2021/22    | 19.44 | 0.09      | 19.27     | 19.61   | 1582 |
| F (8.29932) = 1.210 |            |       |           | p = 0.288 |         |      |

**Supplemental Table S3.** Effect: SEX x GENERATION; unweighted Means, current effect, effective hypothesis decomposition; BMI in 8<sup>th</sup> graders

| SEX                 | Generation | Mean  | Std. Err. | -95.00%   | +95.00% | N    |
|---------------------|------------|-------|-----------|-----------|---------|------|
| Boys                | 2012/13    | 20.48 | 0.09      | 20.31     | 20.66   | 1540 |
|                     | 2013/14    | 20.62 | 0.08      | 20.47     | 20.77   | 2086 |
|                     | 2014/15    | 20.66 | 0.08      | 20.51     | 20.81   | 2082 |
|                     | 2015/16    | 20.78 | 0.08      | 20.62     | 20.94   | 1913 |
|                     | 2016/17    | 20.74 | 0.08      | 20.58     | 20.89   | 1954 |
|                     | 2017/18    | 20.66 | 0.09      | 20.48     | 20.84   | 1469 |
|                     | 2018/19    | 20.90 | 0.08      | 20.74     | 21.05   | 1957 |
|                     | 2019/20    | 20.76 | 0.08      | 20.60     | 20.92   | 1870 |
|                     | 2020/21    | 21.11 | 0.08      | 20.95     | 21.27   | 1902 |
|                     | 2021/22    | 20.93 | 0.08      | 20.76     | 21.09   | 1797 |
| Girls               | 2012/13    | 20.71 | 0.08      | 20.55     | 20.88   | 1756 |
|                     | 2013/14    | 20.77 | 0.08      | 20.61     | 20.93   | 1995 |
|                     | 2014/15    | 21.11 | 0.08      | 20.96     | 21.27   | 2099 |
|                     | 2015/16    | 21.02 | 0.08      | 20.86     | 21.17   | 1976 |
|                     | 2016/17    | 21.12 | 0.08      | 20.96     | 21.28   | 1845 |
|                     | 2017/18    | 21.09 | 0.09      | 20.91     | 21.26   | 1566 |
|                     | 2018/19    | 21.17 | 0.08      | 21.01     | 21.33   | 1875 |
|                     | 2019/20    | 21.18 | 0.08      | 21.02     | 21.33   | 1977 |
|                     | 2020/21    | 20.96 | 0.08      | 20.80     | 21.13   | 1881 |
|                     | 2021/22    | 21.02 | 0.08      | 20.86     | 21.18   | 1953 |
| F (9.37473) = 2.580 |            |       |           | p = 0.006 |         |      |

**Supplemental Table S4.** Test of SS whole model vs. SS residual; dependent variable: BMI; 1<sup>st</sup>, 5<sup>th</sup> and 8<sup>th</sup> grade students

|                 | Multiple<br>R | Multiple<br>R <sup>2</sup> | Adjusted<br>R <sup>2</sup> | SS<br>Model | Df<br>Model | MS<br>Model | SS<br>Residual | Df<br>Residual | MS<br>Residual | F     | p       |
|-----------------|---------------|----------------------------|----------------------------|-------------|-------------|-------------|----------------|----------------|----------------|-------|---------|
| 1 <sup>st</sup> | 0.06          | 0.00                       | 0.00                       | 740.26      | 17          | 43.54       | 178703.04      | 36343          | 4.917124       | 8.86  | < 0.001 |
| 5 <sup>th</sup> | 0.08          | 0.01                       | 0.01                       | 2047.71     | 17          | 120.45      | 357448.03      | 29932          | 11.94          | 10.09 | < 0.001 |
| 8 <sup>th</sup> | 0.06          | 0.00                       | 0.00                       | 1520.33     | 19          | 80.02       | 470305.89      | 37473.00       | 12.55          | 6.38  | < 0.001 |

**Supplemental Table S5.** Bonferroni test; probabilities for post hoc tests error: between MS = 4.924, df = 36352; dependent variable: BMI; effect: GENERATION; 1<sup>st</sup> grade students

|         |         | 95% CI for Mean Difference |        |        | SE    | t      | p <sub>bonf</sub> |
|---------|---------|----------------------------|--------|--------|-------|--------|-------------------|
|         |         | Mean Difference            | Lower  | Upper  |       |        |                   |
| 2013/14 | 2014/15 | -0.037                     | -0.189 | 0.116  | 0.049 | -0.746 | 1.000             |
|         | 2015/16 | 0.051                      | -0.101 | 0.203  | 0.049 | 1.042  | 1.000             |
|         | 2016/17 | 0.054                      | -0.097 | 0.206  | 0.049 | 1.111  | 1.000             |
|         | 2017/18 | 0.023                      | -0.130 | 0.175  | 0.049 | 0.467  | 1.000             |
|         | 2018/19 | 0.275                      | 0.120  | 0.430  | 0.050 | 5.507  | < 0.001           |
|         | 2019/20 | 0.255                      | 0.100  | 0.410  | 0.050 | 5.116  | < 0.001           |
|         | 2020/21 | 0.153                      | -0.004 | 0.311  | 0.051 | 3.030  | 0.088             |
|         | 2021/22 | -0.056                     | -0.212 | 0.101  | 0.051 | -1.098 | 1.000             |
| 2014/15 | 2015/16 | 0.088                      | -0.062 | 0.237  | 0.048 | 1.822  | 1.000             |
|         | 2016/17 | 0.091                      | -0.058 | 0.240  | 0.048 | 1.895  | 1.000             |
|         | 2017/18 | 0.060                      | -0.090 | 0.209  | 0.048 | 1.233  | 1.000             |
|         | 2018/19 | 0.312                      | 0.159  | 0.464  | 0.049 | 6.349  | < 0.001           |
|         | 2019/20 | 0.292                      | 0.140  | 0.444  | 0.049 | 5.953  | < 0.001           |
|         | 2020/21 | 0.190                      | 0.036  | 0.345  | 0.050 | 3.816  | 0.005             |
|         | 2021/22 | -0.019                     | -0.173 | 0.135  | 0.050 | -0.381 | 1.000             |
| 2015/16 | 2016/17 | 0.003                      | -0.145 | 0.152  | 0.048 | 0.068  | 1.000             |
|         | 2017/18 | -0.028                     | -0.178 | 0.122  | 0.048 | -0.582 | 1.000             |
|         | 2018/19 | 0.224                      | 0.072  | 0.376  | 0.049 | 4.570  | < 0.001           |
|         | 2019/20 | 0.204                      | 0.052  | 0.356  | 0.049 | 4.170  | 0.001             |
|         | 2020/21 | 0.102                      | -0.052 | 0.257  | 0.050 | 2.059  | 1.000             |
|         | 2021/22 | -0.107                     | -0.261 | 0.047  | 0.050 | -2.146 | 1.000             |
| 2016/17 | 2017/18 | -0.031                     | -0.180 | 0.118  | 0.048 | -0.651 | 1.000             |
|         | 2018/19 | 0.221                      | 0.069  | 0.373  | 0.049 | 4.517  | < 0.001           |
|         | 2019/20 | 0.201                      | 0.050  | 0.352  | 0.049 | 4.116  | 0.001             |
|         | 2020/21 | 0.099                      | -0.055 | 0.253  | 0.050 | 2.000  | 1.000             |
|         | 2021/22 | -0.110                     | -0.263 | 0.044  | 0.049 | -2.218 | 0.956             |
| 2017/18 | 2018/19 | 0.252                      | 0.100  | 0.405  | 0.049 | 5.123  | < 0.001           |
|         | 2019/20 | 0.232                      | 0.080  | 0.385  | 0.049 | 4.726  | < 0.001           |
|         | 2020/21 | 0.131                      | -0.024 | 0.285  | 0.050 | 2.614  | 0.322             |
|         | 2021/22 | -0.078                     | -0.233 | 0.076  | 0.050 | -1.575 | 1.000             |
| 2018/19 | 2019/20 | -0.020                     | -0.175 | 0.135  | 0.050 | -0.401 | 1.000             |
|         | 2020/21 | -0.122                     | -0.279 | 0.036  | 0.051 | -2.400 | 0.590             |
|         | 2021/22 | -0.331                     | -0.488 | -0.174 | 0.051 | -6.533 | < 0.001           |
| 2019/20 | 2020/21 | -0.102                     | -0.259 | 0.055  | 0.051 | -2.009 | 1.000             |
|         | 2021/22 | -0.311                     | -0.467 | -0.154 | 0.051 | -6.149 | < 0.001           |
| 2020/21 | 2021/22 | -0.209                     | -0.368 | -0.050 | 0.051 | -4.074 | 0.002             |

Standard Error (SE), t-statistics (t) and Bonferroni statistical significance (p<sub>bonf</sub>)

*Note.* Bonferroni correction was used in this analysis to account for multiple comparisons. This analysis was chosen because there were many groups with different sample sizes and because it adjusts the level of significance based on the number of tests performed.

**Supplemental Table S6.** Bonferroni test; probabilities for post hoc tests error: between MS = 11.993, df = 29941; dependent variable: BMI; effect: GENERATION; 5<sup>th</sup> grade students

|         |         | 95% CI for Mean Difference |        |        | SE    | t      | p <sub>bonf</sub> |
|---------|---------|----------------------------|--------|--------|-------|--------|-------------------|
|         |         | Mean Difference            | Lower  | Upper  |       |        |                   |
| 2013/14 | 2014/15 | 0.114                      | -0.148 | 0.376  | 0.084 | 1.352  | 1.000             |
|         | 2015/16 | 0.048                      | -0.206 | 0.301  | 0.082 | 0.583  | 1.000             |
|         | 2016/17 | -1.382×10 <sup>-4</sup>    | -0.251 | 0.250  | 0.081 | -0.002 | 1.000             |
|         | 2017/18 | 0.095                      | -0.159 | 0.349  | 0.082 | 1.163  | 1.000             |
|         | 2018/19 | 0.108                      | -0.146 | 0.361  | 0.082 | 1.315  | 1.000             |
|         | 2019/20 | 0.099                      | -0.161 | 0.359  | 0.084 | 1.178  | 1.000             |
|         | 2020/21 | -0.367                     | -0.665 | -0.068 | 0.096 | -3.804 | 0.005             |
|         | 2021/22 | 0.006                      | -0.256 | 0.268  | 0.084 | 0.072  | 1.000             |
| 2014/15 | 2015/16 | -0.066                     | -0.327 | 0.194  | 0.084 | -0.793 | 1.000             |
|         | 2016/17 | -0.114                     | -0.372 | 0.143  | 0.083 | -1.375 | 1.000             |
|         | 2017/18 | -0.019                     | -0.280 | 0.242  | 0.084 | -0.224 | 1.000             |
|         | 2018/19 | -0.006                     | -0.267 | 0.254  | 0.084 | -0.076 | 1.000             |
|         | 2019/20 | -0.015                     | -0.282 | 0.251  | 0.086 | -0.178 | 1.000             |
|         | 2020/21 | -0.481                     | -0.785 | -0.176 | 0.098 | -4.892 | < 0.001           |
|         | 2021/22 | -0.108                     | -0.376 | 0.161  | 0.087 | -1.247 | 1.000             |
| 2015/16 | 2016/17 | -0.048                     | -0.297 | 0.201  | 0.080 | -0.595 | 1.000             |
|         | 2017/18 | 0.048                      | -0.205 | 0.300  | 0.081 | 0.586  | 1.000             |
|         | 2018/19 | 0.060                      | -0.192 | 0.312  | 0.081 | 0.738  | 1.000             |
|         | 2019/20 | 0.051                      | -0.207 | 0.309  | 0.083 | 0.614  | 1.000             |
|         | 2020/21 | -0.414                     | -0.712 | -0.117 | 0.096 | -4.318 | < 0.001           |
|         | 2021/22 | -0.041                     | -0.302 | 0.219  | 0.084 | -0.494 | 1.000             |
| 2016/17 | 2017/18 | 0.095                      | -0.154 | 0.345  | 0.080 | 1.185  | 1.000             |
|         | 2018/19 | 0.108                      | -0.142 | 0.357  | 0.080 | 1.339  | 1.000             |
|         | 2019/20 | 0.099                      | -0.157 | 0.354  | 0.082 | 1.199  | 1.000             |
|         | 2020/21 | -0.366                     | -0.662 | -0.071 | 0.095 | -3.850 | 0.004             |
|         | 2021/22 | 0.006                      | -0.251 | 0.264  | 0.083 | 0.075  | 1.000             |
| 2017/18 | 2018/19 | 0.012                      | -0.241 | 0.265  | 0.082 | 0.152  | 1.000             |
|         | 2019/20 | 0.003                      | -0.255 | 0.262  | 0.083 | 0.042  | 1.000             |
|         | 2020/21 | -0.462                     | -0.760 | -0.164 | 0.096 | -4.805 | < 0.001           |
|         | 2021/22 | -0.089                     | -0.350 | 0.172  | 0.084 | -1.059 | 1.000             |
| 2018/19 | 2019/20 | -0.009                     | -0.268 | 0.250  | 0.083 | -0.107 | 1.000             |
|         | 2020/21 | -0.474                     | -0.772 | -0.176 | 0.096 | -4.935 | < 0.001           |
|         | 2021/22 | -0.102                     | -0.362 | 0.159  | 0.084 | -1.207 | 1.000             |
| 2019/20 | 2020/21 | -0.465                     | -0.768 | -0.162 | 0.098 | -4.761 | < 0.001           |
|         | 2021/22 | -0.093                     | -0.359 | 0.174  | 0.086 | -1.077 | 1.000             |
| 2020/21 | 2021/22 | 0.373                      | 0.068  | 0.678  | 0.098 | 3.791  | 0.005             |

Standard Error (SE), t-statistics (t) and Bonferroni statistical significance (p<sub>bonf</sub>)

*Note.* Bonferroni correction was used in this analysis to account for multiple comparisons. This analysis was chosen because there were many groups with different sample sizes and because it adjusts the level of significance based on the number of tests performed.

|  |  | 95% CI for Mean Difference |       |       | SE | t | p <sub>bonf</sub> |
|--|--|----------------------------|-------|-------|----|---|-------------------|
|  |  | Mean Difference            | Lower | Upper |    |   |                   |

**Supplemental Table S7.** Bonferroni test; probabilities for post hoc tests error: between MS = 12.571, df = 37483; dependent variable: BMI; effect: GENERATION; 8<sup>th</sup> grade students

|         |         | 95% CI for Mean Difference |        |        | SE    | t      | p <sub>bonf</sub> |
|---------|---------|----------------------------|--------|--------|-------|--------|-------------------|
|         |         | Mean Difference            | Lower  | Upper  |       |        |                   |
| 2012/13 | 2013/14 | -0.090                     | -0.353 | 0.172  | 0.083 | -1.087 | 1.000             |
|         | 2014/15 | -0.284                     | -0.545 | -0.022 | 0.083 | -3.435 | 0.027             |
|         | 2015/16 | -0.296                     | -0.562 | -0.030 | 0.084 | -3.526 | 0.019             |
|         | 2016/17 | -0.319                     | -0.586 | -0.052 | 0.084 | -3.777 | 0.007             |
|         | 2017/18 | -0.276                     | -0.558 | 0.006  | 0.089 | -3.098 | 0.088             |
|         | 2018/19 | -0.425                     | -0.692 | -0.159 | 0.084 | -5.048 | < .001            |
|         | 2019/20 | -0.372                     | -0.638 | -0.106 | 0.084 | -4.418 | < .001            |
|         | 2020/21 | -0.432                     | -0.699 | -0.164 | 0.084 | -5.111 | < .001            |
| 2013/14 | 2021/22 | -0.372                     | -0.640 | -0.104 | 0.085 | -4.392 | < .001            |
|         | 2014/15 | -0.193                     | -0.440 | 0.053  | 0.078 | -2.479 | 0.593             |
|         | 2015/16 | -0.206                     | -0.457 | 0.046  | 0.079 | -2.590 | 0.432             |
|         | 2016/17 | -0.229                     | -0.481 | 0.024  | 0.080 | -2.859 | 0.192             |
|         | 2017/18 | -0.186                     | -0.455 | 0.083  | 0.085 | -2.189 | 1.000             |
|         | 2018/19 | -0.335                     | -0.587 | -0.083 | 0.080 | -4.199 | 0.001             |
|         | 2019/20 | -0.281                     | -0.534 | -0.029 | 0.080 | -3.533 | 0.019             |
|         | 2020/21 | -0.342                     | -0.595 | -0.088 | 0.080 | -4.268 | < .001            |
| 2014/15 | 2021/22 | -0.282                     | -0.535 | -0.028 | 0.080 | -3.510 | 0.020             |
|         | 2015/16 | -0.012                     | -0.262 | 0.238  | 0.079 | -0.156 | 1.000             |
|         | 2016/17 | -0.035                     | -0.286 | 0.216  | 0.079 | -0.441 | 1.000             |
|         | 2017/18 | 0.007                      | -0.260 | 0.275  | 0.085 | 0.087  | 1.000             |
|         | 2018/19 | -0.141                     | -0.392 | 0.109  | 0.079 | -1.784 | 1.000             |
|         | 2019/20 | -0.088                     | -0.339 | 0.163  | 0.079 | -1.112 | 1.000             |
|         | 2020/21 | -0.148                     | -0.400 | 0.104  | 0.080 | -1.861 | 1.000             |
|         | 2021/22 | -0.088                     | -0.340 | 0.164  | 0.080 | -1.105 | 1.000             |
| 2015/16 | 2016/17 | -0.023                     | -0.279 | 0.233  | 0.081 | -0.281 | 1.000             |
|         | 2017/18 | 0.020                      | -0.252 | 0.291  | 0.086 | 0.229  | 1.000             |
|         | 2018/19 | -0.129                     | -0.384 | 0.126  | 0.081 | -1.600 | 1.000             |
|         | 2019/20 | -0.076                     | -0.331 | 0.179  | 0.081 | -0.939 | 1.000             |
|         | 2020/21 | -0.136                     | -0.392 | 0.120  | 0.081 | -1.677 | 1.000             |
|         | 2021/22 | -0.076                     | -0.332 | 0.181  | 0.081 | -0.934 | 1.000             |
| 2016/17 | 2017/18 | 0.042                      | -0.231 | 0.316  | 0.086 | 0.492  | 1.000             |
|         | 2018/19 | -0.106                     | -0.363 | 0.150  | 0.081 | -1.311 | 1.000             |
|         | 2019/20 | -0.053                     | -0.310 | 0.204  | 0.081 | -0.653 | 1.000             |
|         | 2020/21 | -0.113                     | -0.371 | 0.145  | 0.081 | -1.388 | 1.000             |
|         | 2021/22 | -0.053                     | -0.311 | 0.205  | 0.082 | -0.650 | 1.000             |

|         |         | 95% CI for Mean Difference |        |       | SE    | t                       | p <sub>bonf</sub> |
|---------|---------|----------------------------|--------|-------|-------|-------------------------|-------------------|
|         |         | Mean Difference            | Lower  | Upper |       |                         |                   |
| 2017/18 | 2018/19 | -0.149                     | -0.421 | 0.124 | 0.086 | -1.728                  | 1.000             |
|         | 2019/20 | -0.095                     | -0.368 | 0.177 | 0.086 | -1.109                  | 1.000             |
|         | 2020/21 | -0.155                     | -0.429 | 0.118 | 0.086 | -1.799                  | 1.000             |
|         | 2021/22 | -0.095                     | -0.369 | 0.178 | 0.087 | -1.103                  | 1.000             |
| 2018/19 | 2019/20 | 0.053                      | -0.203 | 0.309 | 0.081 | 0.660                   | 1.000             |
|         | 2020/21 | -0.007                     | -0.264 | 0.250 | 0.081 | -0.081                  | 1.000             |
|         | 2021/22 | 0.053                      | -0.204 | 0.311 | 0.081 | 0.656                   | 1.000             |
| 2019/20 | 2020/21 | -0.060                     | -0.317 | 0.197 | 0.081 | -0.739                  | 1.000             |
|         | 2021/22 | -1.343×10 <sup>-5</sup>    | -0.257 | 0.257 | 0.081 | -1.650×10 <sup>-4</sup> | 1.000             |
| 2020/21 | 2021/22 | 0.060                      | -0.198 | 0.318 | 0.082 | 0.734                   | 1.000             |

Standard Error (SE), t-statistics (t) and Bonferroni statistical significance (p<sub>bonf</sub>)

*Note.* Bonferroni correction was used in this analysis to account for multiple comparisons. This analysis was chosen because there were many groups with different sample sizes and because it adjusts the level of significance based on the number of tests performed.

**Supplemental Table S8.1.** Contingency table in the pre-pandemic period for all grades; urban-rural areas in relation to BMI categories

| Grade | Area  |       | BMI Categories |            |         |             | Total |
|-------|-------|-------|----------------|------------|---------|-------------|-------|
|       |       |       | Healthy weight | Overweight | Obesity | Underweight |       |
| 1     | Rural | N     | 5726           | 969        | 2507    | 303         | 9505  |
|       |       | % row | 60.2 %         | 10.2 %     | 26.4 %  | 3.2 %       | 100 % |
|       | Urban | N     | 11600          | 1852       | 5518    | 401         | 19371 |
|       |       | % row | 59.9 %         | 9.6 %      | 28.5 %  | 2.1 %       | 100 % |
|       | Total | N     | 17326          | 2821       | 8025    | 704         | 28876 |
|       |       | % row | 60.0 %         | 9.8 %      | 27.8 %  | 2.4 %       | 100 % |
| 5     | Rural | N     | 5481           | 1439       | 1061    | 195         | 8176  |
|       |       | % row | 67.0 %         | 17.6 %     | 13.0 %  | 2.4 %       | 100%  |
|       | Urban | N     | 11528          | 2774       | 1836    | 411         | 16549 |
|       |       | % row | 69.6 %         | 16.8 %     | 11.1 %  | 2.5 %       | 100 % |
|       | Total | N     | 17009          | 4213       | 2897    | 606         | 24725 |
|       |       | % row | 68.8 %         | 17.1 %     | 11.7 %  | 2.4 %       | 100 % |
| 8     | Rural | N     | 6952           | 1500       | 1212    | 346         | 10010 |
|       |       | % row | 69.5 %         | 15.0 %     | 12.1 %  | 3.4 %       | 100 % |
|       | Urban | N     | 14213          | 2948       | 2093    | 696         | 19950 |
|       |       | % row | 71.2 %         | 14.8 %     | 10.5 %  | 3.5 %       | 100 % |
|       | Total | N     | 21165          | 4448       | 3305    | 1042        | 29960 |
|       |       | % row | 70.6 %         | 14.9 %     | 11.0 %  | 3.5 %       | 100 % |
| Total | Rural | N     | 18159          | 3908       | 4780    | 844         | 27691 |
|       |       | % row | 65.6 %         | 14.1 %     | 17.3 %  | 3.0 %       | 100 % |
|       | Urban | N     | 37341          | 7574       | 9447    | 1508        | 55870 |
|       |       | % row | 66.8 %         | 13.6 %     | 16.9 %  | 2.7 %       | 100 % |
|       | Total | N     | 55500          | 11482      | 14227   | 2352        | 83561 |
|       |       | % row | 66.4 %         | 13.8 %     | 17.0 %  | 2.8 %       | 100 % |



**Supplemental Table S8.2.** Contingency table in the pandemic period for all grades; urban-rural areas in relation to BMI categories

| Grade | Area  |       | BMI Categories |            |         |             | Total |
|-------|-------|-------|----------------|------------|---------|-------------|-------|
|       |       |       | Healthy weight | Overweight | Obesity | Underweight |       |
| 1     | Rural | N     | 1577           | 262        | 584     | 143         | 2566  |
|       |       | % row | 61.5 %         | 10.2 %     | 22.8 %  | 5.6 %       | 100 % |
|       | Urban | N     | 3058           | 546        | 1179    | 136         | 4919  |
|       |       | % row | 62.2 %         | 11.1 %     | 24.0 %  | 2.7 %       | 100 % |
|       | Total | N     | 4635           | 808        | 1763    | 279         | 7485  |
|       |       | % row | 62.0 %         | 10.8 %     | 23.6 %  | 3.7 %       | 100 % |
| 5     | Rural | N     | 1079           | 288        | 254     | 37          | 1658  |
|       |       | % row | 65.1 %         | 17.4 %     | 15.3 %  | 2.2 %       | 100 % |
|       | Urban | N     | 2403           | 626        | 456     | 82          | 3567  |
|       |       | % row | 67.4 %         | 17.6 %     | 12.8 %  | 2.3 %       | 100 % |
|       | Total | N     | 3482           | 914        | 710     | 119         | 5225  |
|       |       | % row | 66.6 %         | 17.5 %     | 13.6 %  | 2.3 %       | 100 % |
| 8     | Rural | N     | 1652           | 370        | 344     | 86          | 2452  |
|       |       | % row | 67.4 %         | 15.1 %     | 14.0 %  | 3.5 %       | 100 % |
|       | Urban | N     | 3601           | 744        | 566     | 170         | 5081  |
|       |       | % row | 70.9 %         | 14.6 %     | 11.1 %  | 3.3 %       | 100 % |
|       | Total | N     | 5253           | 1114       | 910     | 256         | 7533  |
|       |       | % row | 69.7 %         | 14.8 %     | 12.1 %  | 3.4 %       | 100 % |
| Total | Rural | N     | 4308           | 920        | 1182    | 266         | 6676  |
|       |       | % row | 64.5 %         | 13.8 %     | 17.7 %  | 4.0 %       | 100 % |
|       | Urban | N     | 9062           | 1916       | 2201    | 388         | 13567 |
|       |       | % row | 66.8 %         | 14.1 %     | 16.2 %  | 2.8 %       | 100 % |
|       | Total | N     | 13370          | 2836       | 3383    | 654         | 20243 |
|       |       | % row | 66.1 %         | 14.0 %     | 16.7 %  | 3.2 %       | 100 % |

**Supplemental Table S9.1.** Contingency table in the pre-pandemic period for all grades; sexes in relation to BMI categories

| Grade | Area  |       | BMI Categories |            |         |             | Total |
|-------|-------|-------|----------------|------------|---------|-------------|-------|
|       |       |       | Healthy weight | Overweight | Obesity | Underweight |       |
| 1     | Boys  | N     | 8885           | 1400       | 4040    | 465         | 14790 |
|       |       | % row | 60.1 %         | 9.6 %      | 27.3 %  | 3.1 %       | 100 % |
|       | Girls | N     | 8441           | 1421       | 3985    | 239         | 14086 |
|       |       | % row | 59.9 %         | 10.1 %     | 28.3 %  | 1.7 %       | 100 % |
|       | Total | N     | 17326          | 2821       | 8025    | 704         | 28876 |
|       |       | % row | 60.0 %         | 9.8 %      | 27.8 %  | 2.4 %       | 100 % |
| 5     | Boys  | N     | 8291           | 2146       | 1597    | 253         | 12287 |
|       |       | % row | 67.5 %         | 17.5 %     | 12.9 %  | 2.1 %       | 100 % |
|       | Girls | N     | 8718           | 2067       | 1300    | 353         | 12438 |
|       |       | % row | 70.1 %         | 16.6 %     | 10.5 %  | 2.8 %       | 100 % |
|       | Total | N     | 17009          | 4213       | 2897    | 606         | 24725 |
|       |       | % row | 68.8 %         | 17.0 %     | 11.7 %  | 2.5 %       | 100 % |
| 8     | Boys  | N     | 10864          | 2010       | 1484    | 513         | 14871 |
|       |       | % row | 73.1 %         | 13.5 %     | 10.0 %  | 3.4 %       | 100 % |
|       | Girls | N     | 10301          | 2438       | 1821    | 529         | 15089 |
|       |       | % row | 68.3 %         | 16.2 %     | 12.1 %  | 3.5 %       | 100 % |
|       | Total | N     | 21165          | 4448       | 3305    | 1042        | 29960 |
|       |       | % row | 70.6 %         | 14.8 %     | 11.0 %  | 3.5 %       | 100 % |
| Total | Boys  | N     | 28040          | 5556       | 7121    | 1231        | 41948 |
|       |       | % row | 66.9 %         | 13.2 %     | 17.0 %  | 2.9 %       | 100 % |
|       | Girls | N     | 27460          | 5926       | 7106    | 1121        | 41613 |
|       |       | % row | 66.0 %         | 14.2 %     | 17.1 %  | 2.7 %       | 100 % |
|       | Total | N     | 55500          | 11482      | 14227   | 2352        | 83561 |
|       |       | % row | 66.4 %         | 13.8 %     | 17.0 %  | 2.8 %       | 100 % |

**Supplemental Table S9.2.** Contingency table in the pandemic period for all grades; sexes in relation to BMI categories

| Grade | Area  |       | BMI Categories |            |         |             | Total |
|-------|-------|-------|----------------|------------|---------|-------------|-------|
|       |       |       | Healthy weight | Overweight | Obesity | Underweight |       |
| 1     | Boys  | N     | 2408           | 387        | 871     | 171         | 3837  |
|       |       | % row | 62.8 %         | 10.1 %     | 22.7 %  | 4.4 %       | 100 % |
|       | Girls | N     | 2227           | 421        | 892     | 108         | 3648  |
|       |       | % row | 61.1 %         | 11.5 %     | 24.5 %  | 2.9 %       | 100 % |
|       | Total | N     | 4635           | 808        | 1763    | 279         | 7485  |
|       |       | % row | 61.9 %         | 10.8 %     | 23.6 %  | 3.7 %       | 100 % |
| 5     | Boys  | N     | 1706           | 479        | 399     | 55          | 2639  |
|       |       | % row | 64.6 %         | 18.2 %     | 15.1 %  | 2.1 %       | 100 % |
|       | Girls | N     | 1776           | 435        | 311     | 64          | 2586  |
|       |       | % row | 68.7 %         | 16.8 %     | 12.0 %  | 2.5 %       | 100 % |
|       | Total | N     | 3482           | 914        | 710     | 119         | 5225  |
|       |       | % row | 66.6 %         | 17.5 %     | 13.6 %  | 2.3 %       | 100 % |
| 8     | Boys  | N     | 2596           | 533        | 452     | 118         | 3699  |
|       |       | % row | 70.2 %         | 14.4 %     | 12.2 %  | 3.2 %       | 100 % |
|       | Girls | N     | 2657           | 581        | 458     | 138         | 3834  |
|       |       | % row | 69.3 %         | 15.2 %     | 11.9 %  | 3.6 %       | 100 % |
|       | Total | N     | 5253           | 1114       | 910     | 256         | 7533  |
|       |       | % row | 69.7 %         | 14.8 %     | 12.1 %  | 3.4 %       | 100 % |
| Total | Boys  | N     | 6710           | 1399       | 1722    | 344         | 10175 |
|       |       | % row | 65.9 %         | 13.8 %     | 16.9 %  | 3.4 %       | 100 % |
|       | Girls | N     | 6660           | 1437       | 1661    | 310         | 10068 |
|       |       | % row | 66.1 %         | 14.3 %     | 16.5 %  | 3.1 %       | 100 % |
|       | Total | N     | 13370          | 2836       | 3383    | 654         | 20243 |
|       |       | % row | 66.1 %         | 14.0 %     | 16.7 %  | 3.2 %       | 100 % |

**Supplemental Table S10.1.** Descriptive statistics of the PA status; 1<sup>st</sup>, 5<sup>th</sup>, and 8<sup>th</sup> grade in the pre-pandemic and pandemic period.

| Pre-pandemic    |               |          |                    |        | During pandemic |                    |        |
|-----------------|---------------|----------|--------------------|--------|-----------------|--------------------|--------|
|                 |               | Inactive | Irregularly active | Active | Inactive        | Irregularly active | Active |
| 1 <sup>st</sup> | N             | 11119    | 64                 | 3037   | 6324            | 3                  | 496    |
|                 | % row         | 78.2 %   | 0.5 %              | 21.3 % | 92.7 %          | 0.04 %             | 7.26 % |
|                 | BMI $\bar{X}$ | 16.061   | 16.770             | 16.058 | 16.179          | 14.640             | 16.079 |
| 5 <sup>th</sup> | N             | 6354     | 1124               | 13416  | 2600            | 64                 | 2455   |
|                 | % row         | 30.4 %   | 5.4 %              | 64.2 % | 50.8 %          | 1.2 %              | 48.0 % |
|                 | BMI $\bar{X}$ | 19.276   | 19.170             | 18.961 | 19.440          | 19.332             | 19.130 |
| 8 <sup>th</sup> | N             | 9417     | 1514               | 12746  | 4469            | 148                | 2620   |
|                 | % row         | 39.8 %   | 6.4 %              | 53.8 % | 61.8 %          | 2.0 %              | 36.2 % |
|                 | BMI $\bar{X}$ | 21.058   | 20.800             | 20.701 | 21.096          | 20.851             | 20.837 |

Arithmetic mean of body mass index (BMI  $\bar{X}$ )

**Supplemental Table S10.2.** Post hoc tests; Bonferroni tests; dependent variable: BMI; effect: PA status; 1<sup>st</sup>, 5<sup>th</sup>, and 8<sup>th</sup> grade in the pre-pandemic and pandemic period.

| Pre-pandemic    |          |                    |         |                   | During pandemic |                   |
|-----------------|----------|--------------------|---------|-------------------|-----------------|-------------------|
|                 |          |                    | t       | p <sub>bonf</sub> | t               | p <sub>bonf</sub> |
| 1 <sup>st</sup> | Active   | Inactive           | - 0.066 | 1.000             | - 0.915         | 1.000             |
|                 |          | Irregular exercise | - 2.598 | 0.028             | 1.057           | 0.872             |
|                 | Inactive | Irregular exercise | - 2.607 | 0.027             | 1.134           | 0.771             |
| 5 <sup>th</sup> | Active   | Inactive           | - 6.087 | < 0.001           | - 3.059         | 0.007             |
|                 |          | Irregular exercise | - 1.978 | 0.144             | - 0.443         | 1.000             |
|                 | Inactive | Irregular exercise | 0.965   | 1.000             | 0.237           | 1.000             |
| 8 <sup>th</sup> | Active   | Inactive           | - 7.574 | < 0.001           | - 2.880         | 0.012             |
|                 |          | Irregular exercise | - 1.043 | 0.891             | - 0.045         | 1.000             |
|                 | Inactive | Irregular exercise | 2.693   | 0.021             | 0.803           | 1.000             |

t-statistics (t) and Bonferroni statistical significance (p<sub>bonf</sub>)

**Supplemental Table S10.3.** Descriptive statistics of the PA status in relation to sex; 1<sup>st</sup>, 5<sup>th</sup>, and 8<sup>th</sup> grade

| Boys            |       |          |                    |        | Girls    |                    |        |
|-----------------|-------|----------|--------------------|--------|----------|--------------------|--------|
|                 |       | Inactive | Irregularly active | Active | Inactive | Irregularly active | Active |
| 1 <sup>st</sup> | N     | 8886     | 37                 | 1922   | 8557     | 30                 | 1611   |
|                 | % row | 82.0 %   | 0.3 %              | 17.7 % | 83.9 %   | 0.3 %              | 15.8 % |
| 5 <sup>th</sup> | N     | 4058     | 547                | 8560   | 4899     | 641                | 7334   |
|                 | % row | 30.8 %   | 4.2 %              | 65.0 % | 38.0 %   | 5.0 %              | 57.0 % |
| 8 <sup>th</sup> | N     | 6104     | 734                | 8806   | 7779     | 928                | 6560   |
|                 | % row | 39.0 %   | 4.7 %              | 56.3 % | 50.9 %   | 6.1 %              | 43.0 % |
